# Supplementary material for: Defining and grouping children’s therapeutic footwear and criteria for their prescription: an international expert Delphi consensus study
Source: HighWire-hosted journal article supplement (doi:10.1136/bmjopen-2021-051381), 2021-08-01
Supplement: bmjopen-2021-051381supp004_data_supplement.xlsx [file bmjopen-2021-051381supp004_data_supplement.xlsx]

## Sheet: Sheet1
Section 1
Term, Defintion, Grouping, Method of Grouping	Round 1		Round 2		Round 3
Standard overall terminology to be used for clinical footwear interventions for children with mobility impairment		% Frequency of ≥Agree		Relative % Frequency		Relative %Frequency
	"Therapeutic Footwear"	0.6667	Therapeutic Footwear (Term from Round 1)	58.8235	Therapeutic Footwear (Term from Round 1)	81.25
			Orthotic Footwear	23.5294	Orthopaedic Footwear	0
			Orthopaedic Footwear	5.88235	Orthotic Footwear	18.75
			Prescriptive Footwear	11.7647	Prescriptive Footwear	0
			Other	0
Overall Definition for Children's Clinical Footwear Interventions		% Frequency of ≥Agree		Relative % Frequency
	“Footwear that is designed specifically with the purpose to support or alleviate mobility impairment in childhood.”	0.5	Original Round 1 “Footwear that is designed specifically with the purpose to support or alleviate mobility impairment in childhood.”	5.88235
			Modified Round 2 "Footwear that is designed or adapted specifically to protect, support, align, prevent, or correct foot deformity, or to assist mobility and standing in children."	82.3529
			Other	11.7647
Method to Group and Categorise Children's Clinical Footwear Interventions		% Frequency of ≥Agree		Relative % Frequency		% Frequency of ≥Agree
	"Footwear for clinical interventions in childhood is categorised into groupings dependent on their intended therapeutic role."	0.7222	Original Round 1 "Footwear for clinical interventions in childhood is categorised into groupings dependent on their intended therapeutic role."	17.6471	Modified Round 3 "Footwear used as a clinical intervention in childhood should be classified by the intended outcomes of its components."	1
			Modified Round 2 "Footwear used as a clinical intervention in childhood should be classified via the intended therapeutic outcomes of its components."	70.5882
			Other	11.7647
Grouping and Definition "Corrective Footwear"		% Frequency of ≥Agree		Relative % Frequency	Although Consusus reached in Round 2 a number panellist requested addendum to the statement
	"Corrective footwear is children’s therapeutic footwear that is designed to bring about the correction of congenital skeletal lower limb alignment."	0.4444	Original Round 1 "Corrective footwear is children’s therapeutic footwear that is designed to bring about the correction of congenital skeletal lower limb alignment."	0	Modified Round 3 "Corrective footwear is footwear that is designed or adapted to support correction of congenital or acquired foot and ankle deformity in children. This may be secondary to a primary corrective measure such as serial casting or surgery."	Relative % Frequency
			Modified Round 2 "Corrective footwear is children's therapeutic footwear that is designed or adapted to support correction of congenital or acquired foot and ankle deformity in children."	82.3529	Yes: I agree to Round 3 Modified Statement	100
			Other	17.6471	No: I don't agree to Round 3 Modified Statement	0
Grouping and Definition of "Accomodative Footwear"		% Frequency of ≥Agree		Relative % Frequency
	"Accommodative footwear is children’s therapeutic footwear that is designed (modular or bespoke) to reduce compression, and shearing stresses on children’s foot deformities through dimensional matching of footwear upper, insole, and sole to that of the child’s foot."	0.7222	Original Round 1 "Accommodative footwear is children’s therapeutic footwear that is designed (modular or bespoke) to reduce compression, and shearing stresses on children’s foot deformities through dimensional matching of footwear upper, insole, and sole to that of the child’s foot."	11.7647
			Modified Round 2 "Accommodative footwear is children's therapeutic footwear that is designed to prevent deterioration of children's foot deformities through the dimensional matching of the footwear to the child's foot."	76.4706
			Other	11.7647
Grouping and Definition "Functional Footwear"		% Frequency of ≥Agree		Relative % Frequency
	"Functional footwear is children’s therapeutic footwear that is designed to improve dynamic gait parameters of children with mobility impairment, reducing pathological movements and facilitating typical childhood walking patterns."	0.555	Original Round 1 "Functional footwear is children’s therapeutic footwear that is designed to improve dynamic gait parameters of children with mobility impairment, reducing pathological movements and facilitating typical childhood walking patterns."	11.7647
			Modified Round 2 "Functional footwear is children's therapeutic footwear that is designed or adapted to directly assist mobility and standing in children."	76.4706
			Other	11.7647
Method to subgroup and catergorise Functional Footwear		% Frequency of ≥Agree		Relative % Frequency
	"Functional therapeutic footwear is divided into subgroupings which are categorised dependent on the design and functional role."	0.6667	Original Round 1 "Functional therapeutic footwear is divided into subgroupings which are categorised dependent on the design and functional role."	11.7647
			Modfied Round 2 "Functional therapeutic footwear should be classified via its design and the intended therapeutic outcomes of its components."	76.4706
			Other	11.7647
Subgrouping and Definition "Stability Footwear"		% Frequency of ≥Agree		Relative % Frequency		% Frequency of ≥Agree
	"Stability functional therapeutic footwear is a range of footwear that is designed to limit extreme movements of the lower limb to maintain a controlled displacement of the centre of force during gait."	0.5	Orginal Round 1 "Stability functional therapeutic footwear is a range of footwear that is designed to limit extreme movements of the lower limb to maintain a controlled displacement of the centre of force during gait."	11.7647	Modified Round 3 "Stability Footwear is footwear that is designed to assist mobility and standing in children by influencing movements and potentially proprioception of the foot and ankle."	0.9375
			Modfied Round 2 "Stability therapeutic footwear is a range of footwear that is designed to assist mobility and standing in children by enhancing proprioception and influencing movements of the foot and ankle."	64.7059
			Other	23.5294
Sub-Grouping and Definiton "Lift Footwear"		% Frequency of ≥Agree	From Panellist opinion Lift "Raised"* Footwear, Rounded Bottom "Rocker Sole"* Footwear and Instability Footwear, to collectively fall under new subgrouping "Adapted Sole" See Row 43
	"Lift functional therapeutic footwear is a range of footwear designed with a unilateral modular outer or midsole addition to conservatively achieve postural and functional symmetry in individuals with limb length inequality."	0.3889
Sub-Grouping and Definiiton "Rounded Bottom (Rocker Sole)"		% Frequency of ≥Agree
	"Rounded bottom (rocker sole) is a range of functional therapeutic footwear with a forefoot rocker design to assist the sagittal plane progression of the lower limb."	0.3333	* Panellists' preferred term from Round 1 content analysis
Grouping and Definition "Instability"		% Frequency of ≥Agree
	"Instability therapeutic functional footwear consists of a sole designed to promote imbalance to train the individuals motor coordination."	0.3889
Sub-Grouping "Adapted Sole"			Sub-Grouping	% Frequency of ≥Agree
			"Adapted Sole"	0.7647
Definition "Adapted Sole"			Definition	% Frequency of ≥Agree		% Frequency of ≥Agree
			"A range of customised sole adaptions to standard retail or children's therapeutic footwear that would assist mobility or standing in children. "	0.6471	Modified Round 3 "A range of customised sole or heel adaptions to any suitable children's footwear, with the adaptions designed to assist mobility or standing in children.'	1
Text in Red Indicates: Consesus Statement ≥75% Relative Frequency ≥75% Panel ≥Agree
