# Supplementary material for: Defining and grouping children’s therapeutic footwear and criteria for their prescription: an international expert Delphi consensus study
Source: HighWire-hosted journal article supplement (doi:10.1136/bmjopen-2021-051381), 2021-08-01
Supplement: bmjopen-2021-051381supp006_data_supplement.xlsx [file bmjopen-2021-051381supp006_data_supplement.xlsx]

## Sheet: Sheet1
Section 3
Condtion	Round 1		Round 2		Round 3
Cerebral Palsy	Suitability for Intervention	% Frequency of ≥Agree
	"Cerebral palsy is suitable for stability footwear intervention?"	92.31
			Criteria for Treatment	% Frequency of ≥Agree	Criteria for Treatment	% Frequency of ≥Agree
			"Stability footwear may assist mediolateral stability and proprioception of the foot and ankle in standing and walking in children with CP."	78.57
			"Stability footwear may be used alongside other assistive aids to assist standing and walking in children with CP."	85.71
			"Stability footwear should only be issued to children with CP after a critical assessment of the child's mobility needs in respect to other assistive aids or footwear modifications, and with clear intervention outcomes."	85.71
					"Stability footwear is only to be issued as an adjunct to AFO's KAFO's where additional medio-lateral stability is required, and not just to accommodate the orthotic. "	68.75
			"Stability footwear may be used as a sole assistive intervention to assist both foot and ankle walking stability in children with GMFCS 1 and no significant tonal issues."	71.43	Orginal Round 2 "Stability footwear may be used as a sole assistive intervention to assist both foot and ankle stability in walking in children with GMFCS 1 and no significant tonal issues."	81.25
			"Stability footwear may be used alongside other assistive aids to assist walking and standing in ambulant children GMFCS 1-3 with tonal issues."	78.57
			"Stability footwear may be used alongside other assistive aids to assist standing and transfer in non-ambulant children GMFCS 3-4."	71.43	Modified Round 3: "Stability footwear may be used simultaneously with other assistive aids to assist standing and transfer in non-ambulant children GMFCS 3-4. This footwear must be issued to assist stability and not just to accommodate the associated assistive aid"	87.5
			Age Range for Stability Footwear Intervention	Relative %Frequency	Age Range for Stability Footwear Intervention	Relative %Frequency
			1-18 years (with assessed adult transition care)	15.3846	1-18 years (with assessed adult transition care)	6.25
			3-18 years (with assessed adult transition care)	7.69231	3-18 years (with assessed adult transition care)	0
			Initiation and end points of treatment indicated by functional ability and the mobility needs of the child (potential or actual)	69.2308	Initiation and end points of treatment indicated by functional ability and the mobility needs of the child (potential or actual)	87.5
			N/A I do not feel this condition is suitable for stability footwear intervention	7.69231	N/A I do not feel this condition is suitable for stability footwear intervention	6.25
			Outcomes	% Frequency of ≥Agree	Outcomes	% Frequency of ≥Agree
			Passive Ankle ROM	57.15	Modified Round 3: Passive Ankle ROM measured with knee flexed and extended within child's limits	87.5
					Ankle ROM Weight Bearing lunge provided child can get heel to ground	87.5
			Kinematics: Optimising gait movement patterns (Edinburgh Gait Scale)	78.57
			Spatiotemporal: Increased walking velocity, 6MWT, TUG, stride length, cadence	85.71
			Motor skill proficiency: Number of falls	78.57
			Motor skill proficiency: Gross Motor Skills (BOT-2)	71.43	Motor skill proficiency: Gross Motor Skills (BOT-2)	75
			Physiological: Perceived exertion (Borg)	50	Physiological: Perceived exertion (Borg)	75
					Physiological: Physiological Cost Index	81.25
			QoL: Pain	78.57
			QoL: ADL (daily mobility and social interaction)	78.57
Pes planus	Suitability for Intervention	% Frequency of ≥Agree	Suitability for Intervention	% Frequency of ≥Agree
	"Pes planus is suitable for stability footwear intervention?"	46.67	"Stability footwear is a suitable secondary line intervention for symptomatic mobile pes planus in children where foot orthoses have not resolved associated symptoms"	85.72
			Criteria for Treatment	% Frequency of ≥Agree	Criteria for Treatment	% Frequency of ≥Agree
			"Stability footwear may assist foot and ankle stability in children with symptomatic mobile pes planus"	78.57
			"Stability Footwear may be be used alongside foot orthoses in children with insufficiency of posterior tibialis function."	71.43	Modified Round 3: "Stability Footwear may be be used simultaneously with foot orthoses in children with insufficiency of posterior tibialis function."	87.5
			"Stability Footwear may be used alongside foot orthoses in children with significant foot and ankle instability associated with tripping and falling."	85.72
			"Stability footwear may be used alongside foot orthoses in children with conditions associated with motor delay"	64.29	Modified Round 3: Stability footwear may be used simultaneously with foot orthoses in children with conditions associated with motor delay	93.75
			Age Range for Stability Footwear Intervention	Relative %Frequency
			1-18 years (with assessed adult transition care)	15.3846
			5-18 years (with assessed adult transition care)	0
			Initiation and end points of treatment indicated by functional ability and the mobility needs of the child (potential or actual).	76.9231
			N/A I do not feel this condition is suitable for stability footwear intervention.	7.69231
			Outcomes	% Frequency of ≥Agree	Outcomes	% Frequency of ≥Agree
			Foot Posture FPI-6	50	Foot Posture FPI-6	62.5
					Passive Ankle ROM measured with knee flexed and extended within child's limits	80
					Ankle ROM Weight Bearing lunge provided child can get heel to ground	87.5
			Kinematics: Optimising gait movement patterns (Foot and ankle)	76.92
			Spatiotemporal: Increase walking velocity, 6MWT, TUG	71.42	Modified Round 2: Spatiotemporal: Increase walking velocity, 6MWT, TUG 10 meter walk test.	87.5
			Gross motor proficiency: (BOT-2)	64.29	Gross motor proficiency: (BOT-2)	75
			Gross motor proficiency: number of falls	71.42	Motor skill proficiency: Number of falls	87.5
					Physiological: Physiological Cost Index	75
			QoL: Pain	78.57
			QoL: ADL (daily mobility and social interaction)	64.29	QoL: ADL (daily mobility and social interaction)	100
Toe Walking	Suitability for Intervention	% Frequency of ≥Agree	Suitability for Intervention	% Frequency of ≥Agree	Suitability for Intervention	% Frequency of ≥Agree
	"Toe walking is suitable for stability footwear intervention?"	26.67	"Stability footwear may be a suitable treatment if used alongside other stiffened components (insole, stiffend sole) for ITW with no associated hypertonia"	57.14	Modified Round 3 "Stability footwear may be a suitable treatment if used simultaneously with other stiffened components (insole, stiffend sole) for ITW with no associated hypertonia"	60
			Criteria for Treatment	% Frequency of ≥Agree	Criteria for Treatment	% Frequency of ≥Agree
			"Stability footwear may be used for toe walking in developmental conditions with hypermobility and gross motor delay"	57.14	Original Round 2 "Stability footwear may be used for toe walking in developmental conditions with hypermobility and gross motor delay"	66.67
			"Stability footwear may be used alongside other stiffened components for ITW Type 1-2, when the child is able to achieve a plantargrade position"	35.72	Modified Round 3 "Stability footwear may be used to provide mediolateral stability when used simultaneously with stiffened components for ITW Type 1-2, when the child is able to achieve a plantargrade position"	66.67
			Age Range for Stability Footwear Intervention	Relative %Frequency
			1-18 years	0
			4-18 years	7.69231
			4-8 years	15.3846
			Initiation and end points of treatment indicated by functional ability and the mobility needs of the child (potential or actual)	76.9231
			N/A I do not feel this condition is suitable for stability footwear intervention.	0
			Outcomes	% Frequency of ≥Agree	Outcomes	% Frequency of ≥Agree
			Passive Ankle ROM2	53.84	Modified Round 3: Passive Ankle ROM measured with knee flexed and extended within child's limits	66.67
					Ankle ROM Weight Bearing lunge provided child can get heel to ground	73.33
			Kinematics: Optimising gait movement patterns (Heel forefoot contact timing ankle ROM)	57.14	Kinematics: Optimising gait movement patterns (Heel forefoot contact timing ankle ROM)	80
			Kinetic: In-shoe pressure measurement (Heel and Forefoot loading)	42.86	Kinetic: In-shoe pressure measurement (Heel and Forefoot loading)	60
			Spatiotemporal Increased walking velocity, 6MWT, TUG	64.29	Modified Round 3: Spatiotemporal Increased walking velocity, 6MWT, TUG, 10-metre walk test	80
			QoL: Pain	85.72
			QoL: ADL (daily mobility and social interaction)	64.29	QoL: ADL (daily mobility and social interaction)	86.67
					Callus and outer sole wear patterns	66.67
Duchenne Muscular Dystrophy	Suitability for Intervention	% Frequency of ≥Agree	Suitability for Intervention	% Frequency of ≥Agree
	Duchenne muscular dystrophy is suitable for stability footwear intervention?	54.54	"Stability footwear should only be issued to children with DMD after a critical assessment of the child's mobility needs in respect to other assistive aids"	92.31
			Criteria for Treatment	% Frequency of ≥Agree	Criteria for Treatment	% Frequency of ≥Agree
			"Stability Footwear may be used alongside foot orthoses to assist foot and ankle stability in early ambulatory stages"	69.23	Modified Round 3: "Stability Footwear may be used simultaneously with foot orthoses to assist foot and ankle stability in early ambulatory stages."	87.5
			"Stability Footwear may be used alongside AFO's and walking frames to assist walking in late ambulatory stages."	61.54	Modfiied Round 3 "Stability Footwear may be used simultaneously with AFO's and walking frames to assist walking in late ambulatory stages."	87.5
			"Stability Footwear may be used alongside AFO's and standing frames to assist standing and transfer in early non ambulatory stages."	66.25	Modified Round 3 "Stability Footwear may be used simultaneously with AFO's and standing frames to assist standing and transfer in early non ambulatory stages."	87.5
			Age Range for Stability Footwear Intervention	Relative %Frequency	Age Range for Stability Footwear Intervention	Relative %Frequency
			1-18 years	7.69231	1-18 years	6.25
			4-9 years	7.69231	4-9 years	0
			4-18 years	7.69231	4-18 years	0
			Initiation and end points of treatment indicated by functional ability and the mobility needs of the child (potential or actual)	69.2308	Initiation and end points of treatment indicated by functional ability and the mobility needs of the child (potential or actual)	87.5
			N/A I do not feel this condition is suitable for stability footwear intervention.	7.69231	N/A I do not feel this condition is suitable for stability footwear intervention.	6.25
			Outcomes	% Frequency of ≥Agree	Outcomes	% Frequency of ≥Agree
			Passive ankle ROM	69.23	Modified Round 3: Passive Ankle ROM measured with knee flexed and extended within child's limits	68.75
					Ankle ROM Weight Bearing lunge provided child can get heel to ground	81.25
			Kinematics: Optimising gait movement patterns (Heel and forefoot contact timing, ankle ROM)	76.93
			Kinetic: In-shoe pressure measurement (Heel and Forefoot loading)	46.15	Kinetic: In-shoe pressure measurement (Heel and Forefoot loading)	62.5
			Spatiotemporal Increased walking velocity, 6MWT	76.93
					Spatiotemporal: 10-metre walk test	75
			Gross motor proficiency: four square step test	53.84	Gross motor proficiency: four square step test	81.25
			Gross motor proficiency: Number of falls	76.93
			QoL Pain	84.61
			QoL ADL (daily mobility and social interaction)	84.61
					"Outcomes for a degenerative condition must consider the stage of the condition and the capability of the child to perform the tasks."	87.5
Spina Bifida	Suitability for Intervention	% Frequency of ≥Agree
	Spina bifida is suitable for stability footwear intervention?	80
			Criteria for Treatment	% Frequency of ≥Agree	Criteria for Treatment	% Frequency of ≥Agree
			"Stability footwear should only be issued to children with SB after a critical assessment of the child's mobility needs in respect to other assistive aids."	91.67
			"Stability footwear may be used alongside foot orthoses to assist foot and ankle stability in mild level lumbar 5 vertebral involvement."	50	Modified Round 3: "Stability footwear may be used simultaneously with foot orthoses to assist foot and ankle stability in sacral level 1 (Meningocele)"	87.5
			"Stability Footwear may be used alongside AFO's and walking frames to assist walking and standing in lumbar 1-5 vertebral involvement."	58.33	Modified Round 3 "Stability Footwear may be used simultaneously with AFO's and walking frames to assist walking and standing in lumbar level 4-5 (Meningocele, Myelomeningocele)."	87.5
					Modified Round 3 "Stability Footwear may be used simultaneously with HKAFO or KAFO and walking frames to assist walking and standing in lumbar level 1-3 (Meningocele, Myelomeningocele)."	81.25
			Age Range for Stability Footwear Intervention	Relative %Frequency	Age Range for Stability Footwear Intervention	Relative %Frequency
			1-18 years (with assessed adult transition care)	18.1818	1-18 years (with assessed adult transition care)	6.25
			4-18 years (with assessed adult transition care)	9.09091	4-18 years (with assessed adult transition care)	0
			Initiation and end points of treatment indicated by functional ability and the mobility needs of the child (potential or actual).	72.7273	Initiation and end points of treatment indicated by functional ability and the mobility needs of the child (potential or actual).	93.75
			N/A I do not feel this condition is suitable for stability footwear intervention.	0	N/A I do not feel this condition is suitable for stability footwear intervention.	0
			Outcomes	% Frequency of ≥Agree	Outcomes	% Frequency of ≥Agree
			Kinematics: Optimising gait movement patterns (Hoffer Ambulation scale)	72.73	Kinematics: Optimising gait movement patterns (Hoffer Ambulation scale)	87.5
			Spatiotemporal: Increased walking velocity, 6MWT, TUG	90.91
			Gross motor proficiency: (Hoffer Ambulation Score)	81.82
			Physiological Perceived exertion (Borg))	90.91
			QoL: Pain	90.91
			QoL ADL (daily mobility and social interaction)	90.91
Down's Syndrome	Suitability for Intervention	% Frequency of ≥Agree
	Down's syndrome is suitable for stability footwear intervention?	84.62
			Criteria for Treatment	% Frequency of ≥Agree	Criteria for Treatment	% Frequency of ≥Agree
			"Stability footwear may assist mediolateral stability and proprioception of the foot and ankle in standing and walking in children with Down's syndrome"	84.62
			"Stability footwear design should consider last adaptions to accommodate the foot dimensions of children with Down's syndrome"	84.62
			"Stability footwear may be used as a sole assistive aid in pre-walking and learning to walk stages with associated hypotonia and delayed motor milestones."	53.84	Original Round 2 "Stability footwear may be used as a sole assistive aid in pre-walking and learning to walk stages with associated hypotonia and delayed motor milestones."	93.75
			"Stability Footwear may be used alongside foot orthoses to assist walking in individuals with ankle instability"	92.31
			Stability Footwear may be used alongside AFO's to assist walking in individuals with knee instability	76.92	Addendum to Consesus Statement Round 2 "Stability Footwear with a stiffend sole is contraindicated with simultaneous AFO use in individuals with knee hyperextension."	62.5
			Age Range for Stability Footwear Intervention	Relative %Frequency
			1-18 years (with assessed adult transition care)	15.3846
			4-18 years (with assessed adult transition care)	7.69231
			Initiation and end points of treatment indicated by functional ability and the mobility needs of the child (potential or actual) rather than specific age.	76.9231
			N/A I do not feel this condition is suitable for stability footwear intervention.	0
			Outcomes	% Frequency of ≥Agree	Outcomes	% Frequency of ≥Agree
			Foot posture FPI-6	38.43	Foot posture FPI-6	50
			Kinematics: Optimising gait movement patterns (foot and ankle)	69.23	Kinematics: Optimising gait movement patterns (foot and ankle)	87.5
			Spatiotemporal Increase Velocity, 6MWT	76.9231
					Spatiotemporal: 10 Metre Walk Test	81.25
			Gross motor proficiency: (BOT-2)	69.23	Gross motor proficiency: (BOT-2)	75
			Gross motor proficiency: number of falls	84.62
			QoL Pain	92.31
			QoL Comfort with Footwear	76.9231
			QoL ADL (daily mobility and social interaction)	84.62
Intoeing	Suitability for Intervention	% Frequency of ≥Agree	Suitability for Intervention	% Frequency of ≥Agree	Suitability for Intervention	% Frequency of ≥Agree
	Intoeing is suitable for stability footwear intervention?	8.33	"Stability footwear may be a suitable intervention for intoeing if associated with tripping"	16.67	Orginal Round 2: "Stability footwear may be a suitable intervention for intoeing if associated with tripping"	25
			"Stability footwear may be a suitable intervention for intoeing if associated with an underlying neurological condition"	41.67	Original Round 2: "Stability footwear may be a suitable intervention for intoeing if associated with an underlying neurological condition"	43.75
			Age Range for Stability Footwear Intervention	Relative %Frequency	Age Range for Stability Footwear Intervention	Relative %Frequency
			3 years onwards	0
			Initiation and end points of treatment indicated by functional ability and the mobility needs of the child (potential or actual).	72.7273	Initiation and end points of treatment indicated by functional ability and the mobility needs of the child (potential or actual).	81.25
			N/A I do not feel this condition is suitable for stability footwear intervention.	27.2727	N/A I do not feel this condition is suitable for stability footwear intervention.	18.75
			Outcomes	% Frequency of ≥Agree	Outcomes	% Frequency of ≥Agree
			Kinematics: Optimising gait movement patterns (Angle of Gait)	45.45	Modified Round 3: Kinematics: Optimising gait movement patterns (Angle of Gait). Comparison of standing foot progression angle with walking foot progression	62.5
			Spatiotemporal: Increased walking velocity, 6MWT, TUG	36.36	Spatiotemporal: Increased walking velocity, 6MWT, TUG	56.25
			Gross motor proficiency: reduction in tripping	63.63	Gross motor proficiency: reduction in tripping	68.75
			QoL: Pain	45.45	QoL: Pain	75
			QoL ADL (daily mobility and social interaction)	54.54	QoL ADL (daily mobility and social interaction)	75
Other Conditions			Suitable for Stability Footwear Intervention	Relative %Frequency	Suitable for Stability Footwear Intervention	Relative %Frequency
			Charcot Marie Tooth, (Hereditary Motor Sensory Neuropathy)
			Agree	92.3077
			Neutral	0
			Disagree	7.69231
			Hypermobility (Ehlers Danlos Type)
			Agree	92.3077
			Neutral	7.69231
			Disagree	0
			Developmental Coordination Disorder
			Agree	100
			Neutral	0
			Disagree	0
			Rett's Syndrome
			Agree	80
			Neutral	20
			Disagree	0
			Foetal Alcohol syndrome		Foetal Alcohol syndrome
			Agree	50	Agree	44.4444
			Neutral	50	Neutral	0
			Disagree	0	Disagree	55.5556
			Accessory navicular		Accessory navicular
			Agree	30.7692	Agree	50
			Neutral	46.1538	Neutral	31.25
			Disagree	23.0769	Disagree	18.75
			Chronic lateral ankle instability
			Agree	76.9231
			Neutral	15.3846
			Disagree	7.69231
Text in Red Indicates: Consesus Statement ≥75% Relative Frequency ≥75% Panel ≥Agree
6MWT (Six Minute Walk Test)
ADL (Activities of Daily Living)
AFO (Ankle Foot Orthoses)
BOT-2 (Bruininks-Oseretsky Test of Motor Proficiency)
CP (Cerebral Palsy)
DMD (Duchenne Muscular Dystrophy)
GMFCS (Gross Motor Functioning Classification Score)
HKAFO (Hip Knee Ankle Foot Orthoses)
KAFO (Knee Ankle Foot Orthoses)
QoL (Qulaity of Life)
ROM (Range of Motion)
SB (Spina Bifida)
TUG (Timed Up and GO)
